# Supplementary figures and images for: High frequency of phenotypic deviations in Physcomitrella patens plants transformed with a gene-disruption library
Source: Springer Nature journal article supplement (doi:10.1186/1471-2229-2-6), 2002-07-18

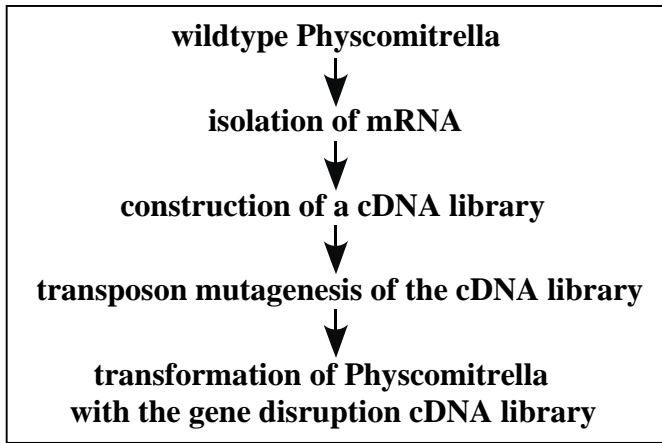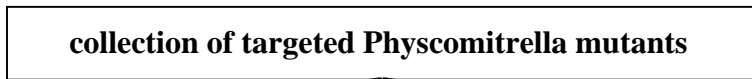

**phenomics**

**metabolomics**

**genomics**

**proteomics**

Supplement: 12870_2002_9_MOESM1_ESM.pdf [file 12870_2002_9_MOESM1_ESM.pdf]

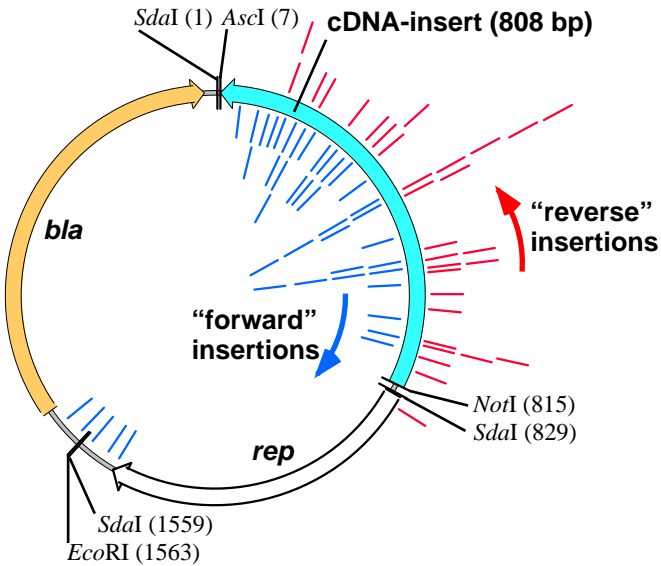

Supplement: 12870_2002_9_MOESM2_ESM.pdf [file 12870_2002_9_MOESM2_ESM.pdf]

**A**

| ploidy level    |   | wild-type morphology | deviant morphology |
|-----------------|---|----------------------|--------------------|
| normal growth   | h | 13,454 (83.03%)      | 679 (4.19%)        |
|                 | p | 113 (0.70%)          | 286 (1.77%)        |
| retarded growth | h | 5 (0.03%)            | 823 (5.08%)        |
|                 | p | 0 (0.00%)            | 843 (5.20%)        |
|                 |   | 13,572 (83.76%)      | 2,631 (16.24%)     |

**B**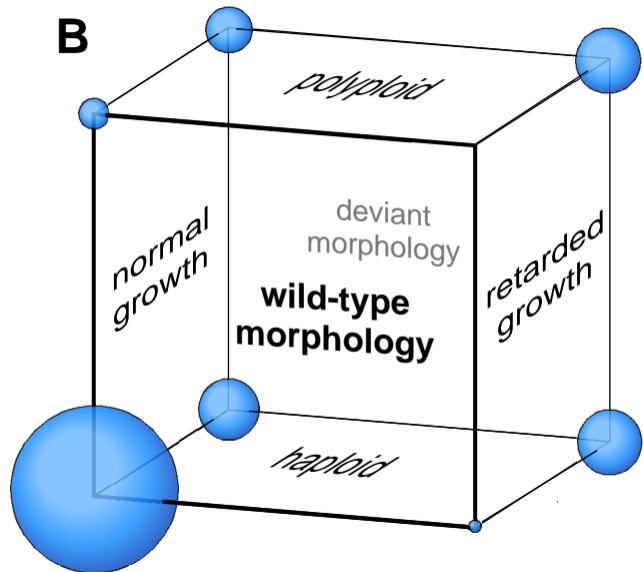

Supplement: 12870_2002_9_MOESM5_ESM.pdf [file 12870_2002_9_MOESM5_ESM.pdf]
